# Supplementary material
Source: Research Square preprint supplement (doi:10.21203/rs.3.rs-8978712/v1)
Supplement: Supplementary file 1 [file 90a5f50fbfafc68434c7bb38.docx]

***Supplementary Materials***

**Relationships between altered brain activity, childhood trauma, neurotransmitter, and genetic traits in Chinese early adulthood with gender dysphoria**

**MRI Data Acquisition**

Data were collected using a GE Discovery MR750 3.0T system equipped with an 8-channel phased-array head coil. During the scanning procedure, all participants were positioned supine with their heads entering the scanner first. Foam padding was symmetrically placed on both sides of the head to minimize movement. They were instructed to keep their eyes closed, remain relaxed, and stay awake throughout the session. Post-scan verification confirmed that none of the participants had fallen asleep during the data acquisition.

A gradient-echo echo-planar imaging sequence, configured with these parameters, was utilized to gather the rs-fMRI data: time repetition/time echo (TR/TE) = 2000/25 ms, voxel size = 3.75 × 3.75 × 3 mm3, flip angle = 90◦, field of view (FOV) = 240 × 240 mm2, slice thickness/gap = 3.0/1.0 mm, matrix = 64 × 64, 35 transversal slices, and 210 scans in 7 min. Moreover, a three-dimensional brain volume imaging sequence encompassing the entire brain was employed to gather the structural data with these parameters: flip angle = 12◦, TR/TE = 8.2/3.2 ms, slice thickness/gap = 1.0/0 mm, bandwidth = 31.25 Hz, matrix = 256 × 256, NEX = 1, FOV = 240 × 240 mm, and acquisition time = 3 min 45 s. To rule out any anatomical abnormalities, routine examination images were also obtained by two skilled neuroradiologists for confirmation.
